# Supplementary material for: Krill Oil’s Protective Benefits against Ultraviolet B-Induced Skin Photoaging in Hairless Mice and In Vitro Experiments
Source: MDPI journal article supplement (doi:10.3390/md21090479), 2023-08-30
Supplement: s1 [file s1]

Figure S1: GC analysis of KO for EPA+DHA contents

[Krill oil; EPA+DHA]

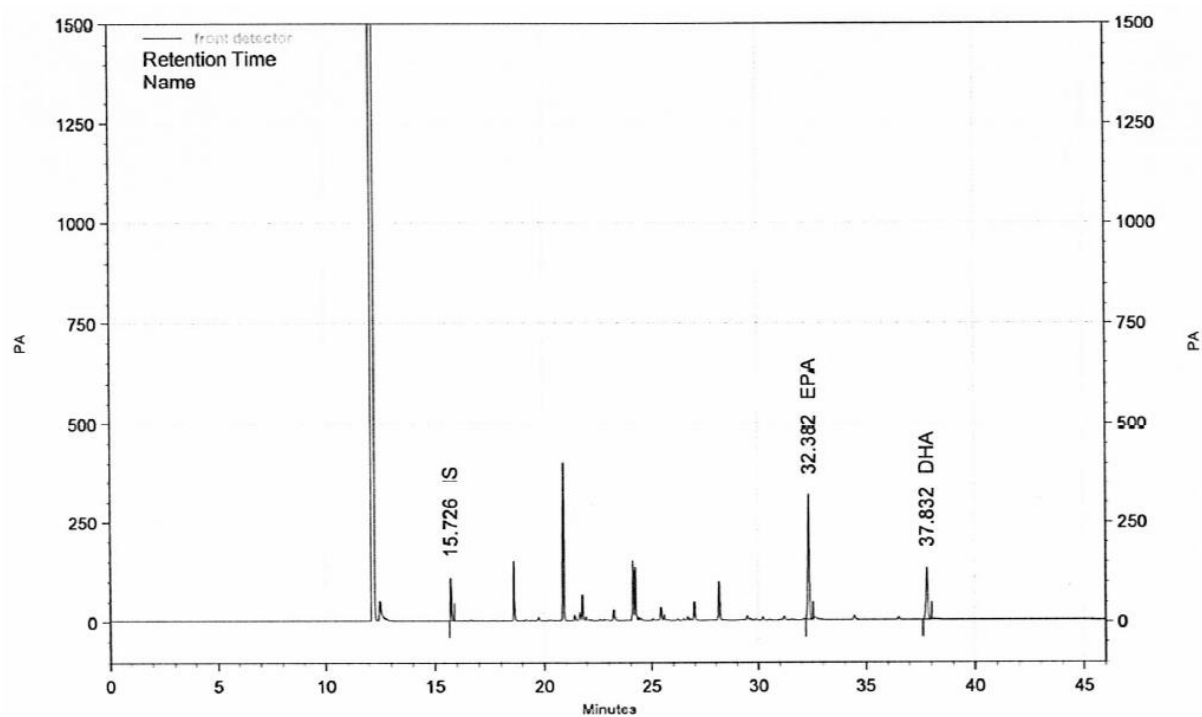

[Blank; EPA+DHA]

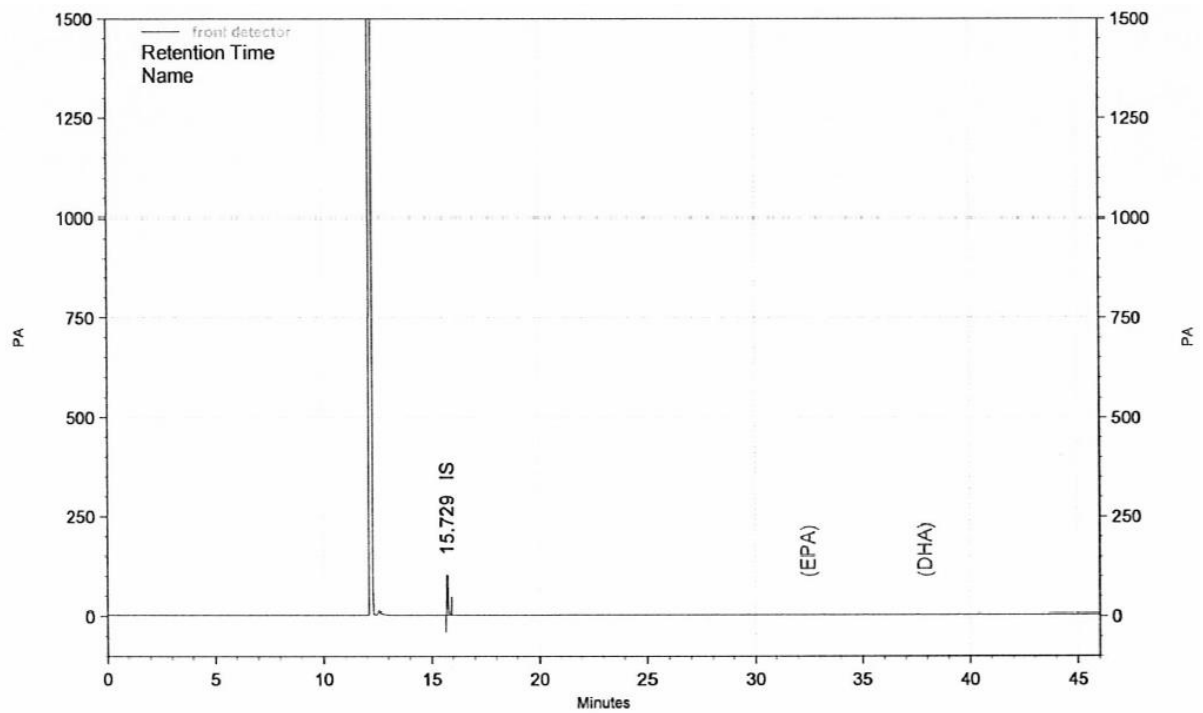

[Standard; EPA+DHA]

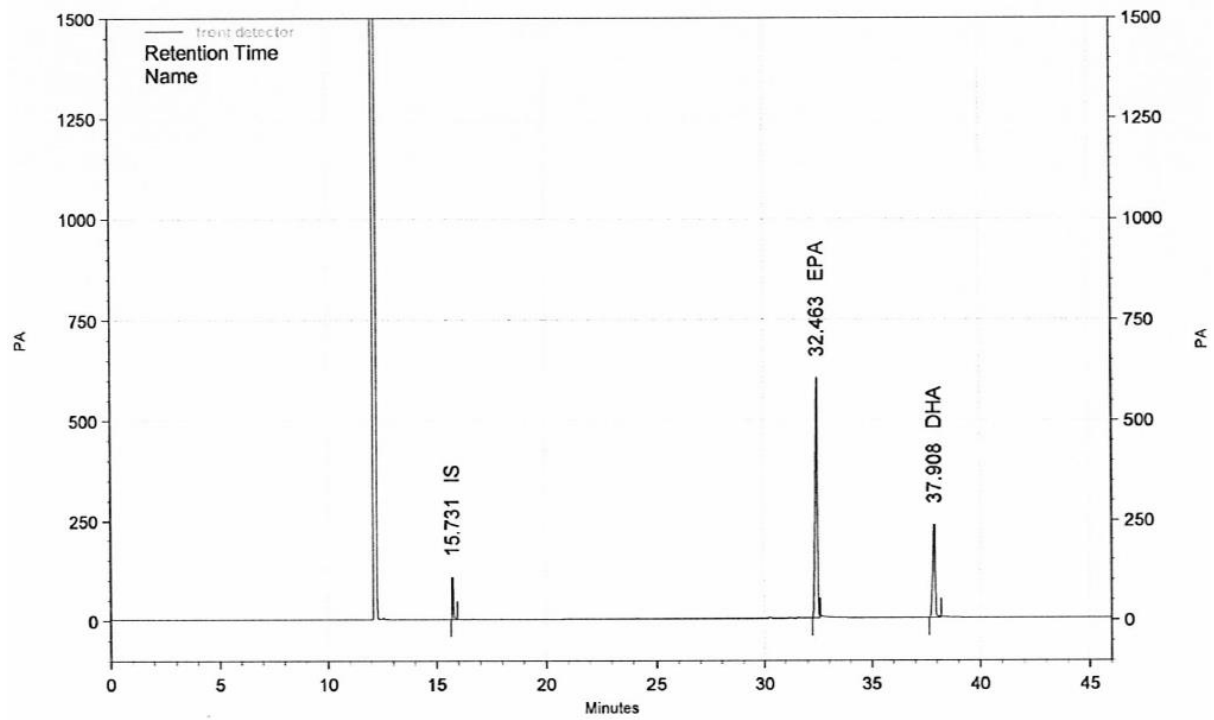

Table S1. Primer sequences for real-time RT-PCR

| Target                     | 5' – 3'   | Sequence                     |
|----------------------------|-----------|------------------------------|
| Hyaluronic acid synthase 1 | Sense     | GCATGGGCTATGCTACCAAGTAT      |
|                            | Antisense | AGGAGGGCGTCTCCGAGTA          |
| Hyaluronic acid synthase 2 | Sense     | GACCCTATGGTTGGAGGTGTTG       |
|                            | Antisense | ACGCTGCTGAGGAAGGAGATC        |
| Hyaluronic acid synthase 3 | Sense     | AGACCGAGCTAGCCTTCCTAGT       |
|                            | Antisense | TAATGGCCAGATACAGCATGAG       |
| Collagen type I alpha 1    | Sense     | GCGGTAACGATGGTGCTGTT         |
|                            | Antisense | CTTACCCTTAGCACCAAC           |
| Collagen type I alpha 2    | Sense     | ATTGTCGCCAGTGAG              |
|                            | Antisense | CTGGTCCTGCTGGT               |
| TGF- $\beta$ 1             | Sense     | GCAACATGTGGAAGTCTACCAGAA     |
|                            | Antisense | GACGTCAAAGACAGCCACTCA        |
| p38 MAPK                   | Sense     | CGTTGTTTCCTGGTACAGACC        |
|                            | Antisense | CCATTCTTCTTGGTCAAGGG         |
| Protein kinase B (AKT)     | Sense     | TACTCATTCCAGACCCACGA         |
|                            | Antisense | GAGGTTCTCCAGCTTCAGGT         |
| Matrix metalloprotease-1   | Sense     | AAGGTTAGCTTACTGTCACACGCTT    |
|                            | Antisense | CGACTCTAGAAACACAAGAGCAAGA    |
| Matrix metalloprotease-9   | Sense     | CCCGGACCAAGGATACAG           |
|                            | Antisense | GGCTTTCTCTCGGTACTG           |
| Matrix metalloprotease-13  | Sense     | CATCCATCCCGTGACCTTAT         |
|                            | Antisense | GCATGACTCTCACAATGCGA         |
| Glutathione reductase      | Sense     | TGCGTGAATGTTGGATGTGTACCC     |
|                            | Antisense | CCGGCATTCTCCAGTTCCTCG        |
| Nox2                       | Sense     | AGCTATGAGGTGGTGTGTTAGTGG     |
|                            | Antisense | CACAATATTTGTACCAGACAGACTTGAG |
| $\beta$ -actin             | Sense     | AGCTGCGTTTTACACCCTTT         |
|                            | Antisense | AAGCCATGCCAATGTTGTCT         |

RT-PCR = reverse transcription polymerase chain reaction; TGF- $\beta$ 1= transforming growth factor (TGF)- $\beta$ 1; MAPK = Mitogen-activated protein kinase; Nox2 = *gp91phox* subunit of the phagocyte NADPH oxidase
